# Supplementary material for: Terahertz molecular resonance of cancer DNA
Source: Springer Nature journal article supplement (doi:10.1038/srep37103), 2016-11-15
Supplement: 41598_2016_BFsrep37103_MOESM1_ESM.pdf [file 41598_2016_BFsrep37103_MOESM1_ESM.pdf]

# Terahertz molecular resonance of cancer DNA

Hwayeong Cheon<sup>1</sup>, Hee-jin Yang<sup>2</sup>, Sang-Hun Lee<sup>1</sup>, Young A Kim<sup>3</sup> and Joo-Hiuk Son<sup>1†</sup>

<sup>1</sup> Department of Physics, University of Seoul, Seoul 02504, Republic of Korea

<sup>2</sup> Department of Neurosurgery, SMG-SNU Boramae Medical Center, Seoul 07061, Republic of Korea

<sup>3</sup> Department of Pathology, SMG-SNU Boramae Medical Center, Seoul 07061, Republic of Korea

† To whom correspondence should be addressed: [joohiuk@uos.ac.kr](mailto:joohiuk@uos.ac.kr)

Keywords: terahertz, DNA methylation, molecular resonance, optical diagnosis of cancer

## 18 Supplementary information

### 19 **Measurement system.**

20 The THz time-domain spectroscopy (THz-TDS) system consisted of a Ti:sapphire  
21 femtosecond oscillator (Synergy; Spectra-Physics) pumped by a 10-W Verdi diode laser. The  
22 10-fs pulse laser was used at a wavelength of 800 nm, with an 80-MHz repetition rate. A  
23 polarizing beam-splitter was used to separate the laser beam, and the separated beams were  
24 sent towards the emitter and the detector. The emitter was a p-InAs crystal that utilized the  
25 photo-Dember effect, and the laser beam was incident at  $78^\circ$  on the surface of the crystal for  
26 high THz intensity. The emitting THz beam was gathered by a parabolic mirror and focused  
27 onto the sample holder by a pair of THz focusing lenses (Tsurupica; Microtech Instrument,  
28 Inc.), which have high transmission and low surface loss for THz waves. The THz beam was  
29 focused on the centre of the gap of the detector, a 5- $\mu\text{m}$ -gap, parallel-line, photoconductive  
30 antenna (PCA) (PCA-40-06-10-800-h; Batop), using a parabolic mirror and a  
31 hyperhemispherical silicon lens. The THz beam was probed on PCA using a laser beam on the  
32 detector. The spectroscopic system and the sample holder were confined in a closed box under  
33 2% humidity to reduce the absorption of water vapour and prevent the surface of the window  
34 of the low-temperature sample holder from frosting over. The pellet samples were measured  
35 by a cryostat (ST-100-FTIR; Janis Research Company), and the liquid samples were measured  
36 on a temperature-controlled sample holder. The sample holder was specially designed to freeze  
37 aqueous solution. The sample holder was contacted a pair of thermoelectric coolers that  
38 maintained the temperature of the sample at  $-20^\circ\text{C}$  (253 K) with  $\pm 0.05^\circ\text{C}$  variation. Two z-  
39 cut quartz windows were needed to flatten the frozen sample disk. The upper window, which  
40 removed after the freezing process, was made of a hydrophobic material (Teflon), and its

41 surface was treated to be more hydrophobic (the contact angle was larger than  $100^\circ$ ). The  
42 frozen samples were stably attached on a single quartz window during THz scanning at very  
43 low humidity.

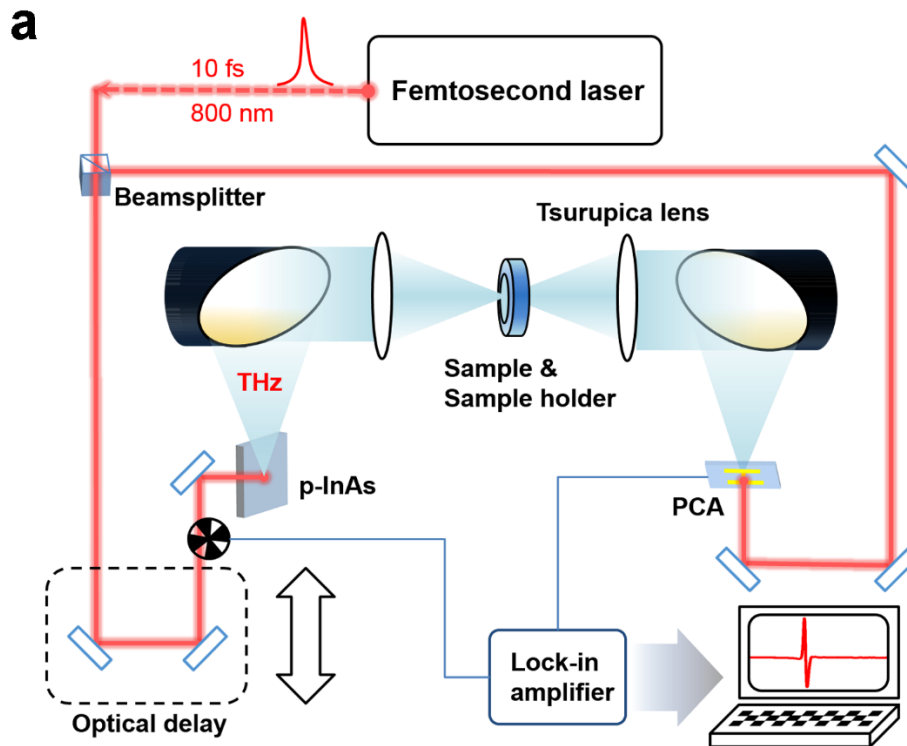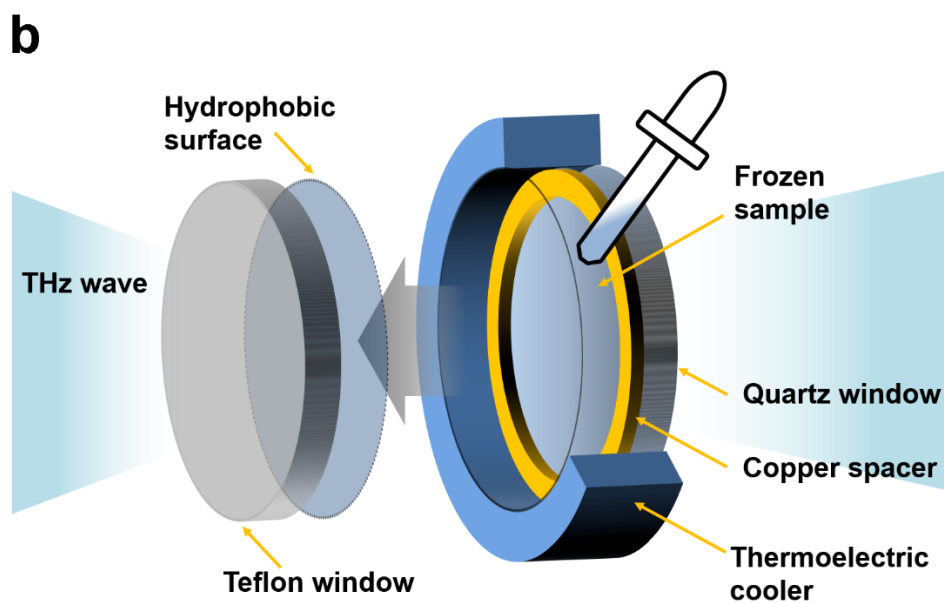

Supplementary Figure 1 | (a) THz-TDS system and (b) the schematic of a temperature-controlled sample holder. The THz beam was focused onto the centre of the sample holder and transmitted through the sample and a single quartz window. A Teflon window flattened the surface of the frozen liquid samples to calculate the optical coefficients using Fresnel's equation, and was removed before the measurement to reduce attenuation by the window<sup>52</sup>. We measured the THz waveforms of the samples after the temperature stabilized at 253 K.

44

45

#### 46 **Trend curves of absorption coefficient of ice.**

47 The absorption coefficient of ice was measured to be somewhere in the valid range from 0.1–  
48 2.0 THz and fitted to determine the baseline form. Ice has the influence on the sample signal  
49 because ice constitutes the bulk of the sample. The measured ice data were fit best by a  
50 Gaussian function in the valid THz range (Supplementary Fig. 2).

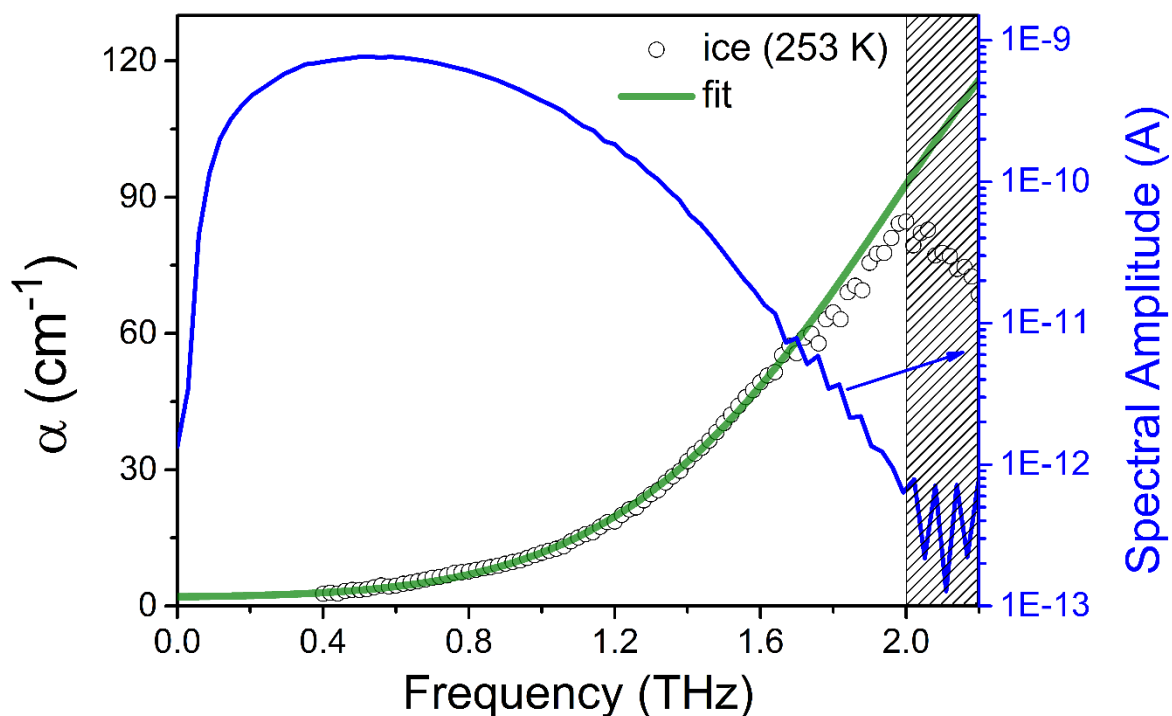

Supplementary Figure 2 | Absorption coefficient of ice (253 K) in the range of 0.4–2.0 THz. The THz

spectrum (blue line) was obtained up to 2.0 THz due to the attenuation of ice. The black open circles are the measured data for the absorption coefficient of ice. The fit (green line) shows that a Gaussian function gives good agreement with the measurement result.

51

52 **Quantification of the DNA methylation signal.**

53 A commercial biological quantification method for global DNA methylation was used to  
 54 validate our THz quantification technique. The quantification kit was the Methylamp Global  
 55 DNA Methylation Quantification Ultra Kit (ELISA-like reaction, Epigenek Inc.). The degree  
 56 of global DNA methylation is shown in Supplementary Table 1.

57

58 **Supplementary Table 1 | Relative quantification of global methylation for DNA samples using an ELISA-**  
 59 **like method**

|                                                                                                                                                                  | OD <sup>a</sup> average                 | Methylation % | Standard Deviation | Relative p value |
|------------------------------------------------------------------------------------------------------------------------------------------------------------------|-----------------------------------------|---------------|--------------------|------------------|
| <b>Samples</b>                                                                                                                                                   |                                         |               |                    |                  |
| 293T                                                                                                                                                             | 0.269 <sup>1</sup> , 0.184 <sup>2</sup> | 10.744        | 0.006              | 0.421            |
| Methylated 293T                                                                                                                                                  | 0.628 <sup>1</sup>                      | 25.522        | 0.101              | 1.000            |
| PC3                                                                                                                                                              | 0.334 <sup>2</sup>                      | 23.030        | 0.104              | 0.902            |
| A431                                                                                                                                                             | 0.482 <sup>1</sup>                      | 19.533        | 0.024              | 0.765            |
| A549                                                                                                                                                             | 0.292 <sup>2</sup>                      | 19.476        | 0.083              | 0.763            |
| MCF-7                                                                                                                                                            | 0.386 <sup>1</sup>                      | 15.581        | 0.003              | 0.611            |
| SNU-1                                                                                                                                                            | 0.177 <sup>2</sup>                      | 13.004        | 0.046              | 0.510            |
| <b>Control</b>                                                                                                                                                   |                                         |               |                    |                  |
| Positive Control                                                                                                                                                 | 0.600 <sup>1</sup> , 0.350 <sup>2</sup> |               |                    |                  |
| Negative Control                                                                                                                                                 | 0.008 <sup>1</sup> , 0.060 <sup>2</sup> |               |                    |                  |
| $\text{Methylation \%} = \frac{(\text{sample OD}^a - \text{Negative OD}) / X^*}{(\text{positive control OD} - \text{Negative control OD}) \times 10} \times 100$ |                                         |               |                    |                  |
| X*: CG <sup>b</sup> content (human DNA: 41%)<br># <sup>1,2</sup> : matched controls for each sample                                                              |                                         |               |                    |                  |

60 <sup>a</sup>OD: Optical Density

61 <sup>b</sup>CG: cytosine nucleotide – guanine nucleotide in the linear sequence of bases

62
